# Supplementary material for: An Efficient Protein Evolution Workflow for the Improvement of Bacterial PET Hydrolyzing Enzymes
Source: MDPI journal article supplement (doi:10.3390/ijms23010264), 2021-12-27
Supplement: s1 [file s1]

**SUPPORTING INFORMATION**

|                   |           |       |            |
|-------------------|-----------|-------|------------|
| <b>Table</b>      | <b>of</b> | ..... | <b>S2</b>  |
| <b>Contents</b>   |           |       |            |
| <b>Table S1</b>   |           | ..... | <b>S3</b>  |
| <b>Table S2</b>   |           | ..... | <b>S4</b>  |
| <b>Table S3</b>   |           | ..... | <b>S5</b>  |
| <b>Table S4</b>   |           | ..... | <b>S6</b>  |
| <b>Table S5</b>   |           | ..... | <b>S7</b>  |
| <b>Figure S1</b>  |           | ..... | <b>S9</b>  |
| <b>Figure S2</b>  |           | ..... | <b>S10</b> |
| <b>Figure S3</b>  |           | ..... | <b>S11</b> |
| <b>Figure S4</b>  |           | ..... | <b>S12</b> |
| <b>Figure S5</b>  |           | ..... | <b>S13</b> |
| <b>Figure S6</b>  |           | ..... | <b>S14</b> |
| <b>Figure S7</b>  |           | ..... | <b>S15</b> |
| <b>Figure S8</b>  |           | ..... | <b>S16</b> |
| <b>Figure S9</b>  |           | ..... | <b>S17</b> |
| <b>Figure S10</b> |           | ..... | <b>S18</b> |
| <b>References</b> |           | ..... | <b>S19</b> |

**TABLE S1**

| Residue       | Group                        | Type(s) of interaction                      | Frequency (%)<br>of MD<br>frames) | $\Delta G_{\text{bind}}$<br>(kcal/mol) |
|---------------|------------------------------|---------------------------------------------|-----------------------------------|----------------------------------------|
| <u>Tyr87</u>  | <u>Backbone</u> ; side chain | <u>Hydrogen bond</u> ; hydrophobic stacking | 100.0                             | -2.6                                   |
| <u>Ser160</u> | <u>Side chain</u>            | <u>van der Waals</u>                        | 100.0                             | 0.9                                    |
| <u>Met161</u> | <u>Backbone</u>              | <u>Hydrogen bond</u>                        | 98.3                              | -2.4                                   |
| Phe238        | Backbone; side chain         | Hydrophobic stacking                        | 93.9                              | -3.3                                   |
| Trp185        | Side chain                   | Hydrogen bond; hydrophobic stacking         | 87.4                              | -2.3                                   |
| Arg280        | Backbone; side chain         | Hydrogen bond; van der Waals                | 85.4                              | -1.4                                   |
| Thr279        | Backbone; side chain         | Hydrogen bond; van der Waals                | 85.4                              | -0.9                                   |
| Ser93         | Backbone; side chain         | van der Waals                               | 83.2                              | -1.5                                   |
| Ile208        | Backbone; side chain         | Hydrophobic contact                         | 80.6                              | -2.6                                   |
| Gly234        | Backbone                     | van der Waals                               | 79.7                              | -0.9                                   |
| Ser242        | Backbone                     | van der Waals                               | 79.2                              | -0.1                                   |
| His237        | Side chain                   | van der Waals                               | 78.6                              | -0.1                                   |
| Ser245        | Backbone; side chain         | van der Waals                               | 75.3                              | -0.7                                   |
| Ser236        | Backbone; side chain         | van der Waals                               | 61.6                              | -0.8                                   |
| Cys239        | Backbone                     | van der Waals                               | 51.2                              | -1.3                                   |
| His159        | Side chain                   | Hydrogen bond; van der Waals                | 50.2                              | -1.0                                   |
| Asn241        | Side chain                   | Hydrogen bond; van der Waals                | 50.1                              | -1.1                                   |

List of pairwise interactions between IsPETase residues and the ligand 2-HE-(MHET)<sub>6</sub> during the MD simulations. The predicted average  $\Delta G_{\text{bind}}$  contribution of each protein residue was calculated according to MM-GBSA analysis. The table includes only interactions at a distance  $\leq 3.6$  Å observed in, at least, 50% of the MD frames. The residues corresponding to positions selected for SSM are highlighted in red; the residues (and their interactions) essential for catalysis are underlined. Ser160 has a positive  $\Delta G_{\text{bind}}$  because it was harmonically constrained to the attacked carbonyl of the docked ligand.

**TABLE S2**

Primers used for site-saturation mutagenesis carrying the NNK-degenerated codon (N = A, C, G or T; K = G or T; M = A or C).

| Position    | Primers with NNK codon (in bold)                                      |
|-------------|-----------------------------------------------------------------------|
| <b>Y87</b>  | Forward: 5'-GATTGCAATCGTCCCCGGG <b>NNK</b> ACCGCGCGTCAAAGCAGC-3'      |
|             | Reverse: 5'-GCTGCTTTGACGCGCGGT <b>MNN</b> CCCCGGGGACGATTGCAATC-3'     |
| <b>W185</b> | Forward: 5'-GGCGCCAN <b>NK</b> GACTCTTCAACCAACTTCAGCAGTGTTACCGTG-3'   |
|             | Reverse: 5'-GAAGAGTC <b>MNN</b> TGGCGCCTGCGGTGCCGCTGCTTTTAAAC-3'      |
| <b>F238</b> | Forward: 5'-GGTAGCCAC <b>NNK</b> TGTGCCAACTCTGGGAACAGCAACCAGG-3'      |
|             | Reverse: 5'-GGCACAM <b>NN</b> GTGGCTACCGCCGTTAATTTCCAGAACTGTTTTGC-3'  |
| <b>R280</b> | Forward: 5'-CCAACAGCACAN <b>NK</b> GTGTCGGATTTTCGCACCGCGAACTGTTCCC-3' |
|             | Reverse: 5'-CCGACAC <b>MNN</b> TGTGCTGTTGGGATTCTCACAGGCGAAGGTTG-3'    |

**TABLE S3**

Levels of active  $\Delta$ IsPET variants in the libraries produced at positions Y87, W185, F238, and R280. The screening was performed on 3 mM BHET for 3 hours at 37 °C or on 0.21 mg PET nanoparticles for 4 hours at 50 °C in 1 mM sodium phosphate buffer, 100 mM NaCl, pH 8.1, using the colorimetric assay with PSP dye on microtiter plates. For each library, at least 94 independent clones have been screened to provide an almost full library coverage complement (i.e. >95%) [1]. Percentages were calculated considering the mean activity of the wild-type clones as 100%.

Score value classification: on BHET: lower, from 0 to 55%; similar, from 55 to 120%; higher, >120% of the value determined for  $\Delta$ IsPET; on PET nanoparticles: lower, from 0 to 90%; similar, from 90 to 120%; and higher, >120% of the value determined for  $\Delta$ IsPET.

| Position | Codon | Library evaluation   |         |        |                         |         |        | Selected variants |                           |               |                       |                      |
|----------|-------|----------------------|---------|--------|-------------------------|---------|--------|-------------------|---------------------------|---------------|-----------------------|----------------------|
|          |       | Activity on BHET (%) |         |        | Activity on nanoPET (%) |         |        | Mutation          | Substitutions<br>(number) | Encoded<br>AA | Relative activity (%) |                      |
|          |       | Lower                | Similar | Higher | Lower                   | Similar | Higher |                   |                           |               | BHET <sup>1</sup>     | nanoPET <sup>2</sup> |
| Y87      | TAC   | 69                   | 25      | 6      | 42                      | 53      | 5      | TTT               | 2                         | Phe           | 61                    | 138                  |
|          |       |                      |         |        |                         |         |        | CTT               | 3                         | Leu           | 74                    | 135                  |
|          |       |                      |         |        |                         |         |        | TCT               | 2                         | Ser           | 43                    | 130                  |
|          |       |                      |         |        |                         |         |        | TGG               | 2                         | Trp           | 51                    | 124                  |
| W185     | TGG   | 93                   | 7       | 0      | not determined          |         |        | -                 | -                         | -             | -                     | -                    |
| F238     | TTT   | 8                    | 55      | 37     | 38                      | 55      | 7      | GCT               | 2                         | Ala           | 174                   | 165                  |
|          |       |                      |         |        |                         |         |        | GAG               | 3                         | Glu           | 155                   | 61                   |
|          |       |                      |         |        |                         |         |        | AAG               | 3                         | Lys           | 143                   | 73                   |
| R280     | CGC   | 8                    | 79      | 13     | 46                      | 43      | 11     | GCG               | 3                         | Ala           | 121                   | 159                  |
|          |       |                      |         |        |                         |         |        | AAG               | 3                         | Lys           | 78                    | 137                  |
|          |       |                      |         |        |                         |         |        | CCG               | 2                         | Pro           | 90                    | 135                  |
|          |       |                      |         |        |                         |         |        | GTG               | 3                         | Val           | 111                   | 147                  |

<sup>1</sup> Determined after 3 hours of incubation at 37 °C

<sup>2</sup> Determined after 5 hours of incubation at 50 °C

**TABLE S4**

Production yields and relative activity of  $\Delta$ IsPET and selected variants. Proteins were purified from 1 L of culture. Specific activity was determined on 10 mM *p*NPA as substrate at 30 °C in 50 mM sodium phosphate buffer, 100 mM NaCl, pH 7. Relative activity values on BHET were determined at 1.6 mM substrate concentration in the presence of 0.03 mM PSP at 30 °C in 1 mM sodium phosphate buffer, 100 mM NaCl, pH 8.1.

| Variant        | Protein yield         |                         | Specific activity on<br><i>p</i> NPA<br>(U/mg) | Relative activity on BHET<br>( $\Delta$ Abs <sub>558</sub> /min) |
|----------------|-----------------------|-------------------------|------------------------------------------------|------------------------------------------------------------------|
|                | mg/g <sub>cells</sub> | mg/L <sub>culture</sub> |                                                |                                                                  |
| $\Delta$ IsPET | 6.7                   | 12.7                    | 12.4 ± 0.4                                     | 1.00 ± 0.11                                                      |
| Y87F           | 5.5                   | 14.4                    | 12.5 ± 1.8                                     | 0.75 ± 0.06                                                      |
| Y87L           | 2.9                   | 7.1                     | 7.6 ± 0.4                                      | 0.37 ± 0.06                                                      |
| F238A          | 3.1                   | 6.8                     | 10.1 ± 1.1                                     | 1.60 ± 0.03                                                      |
| F238E          | 7.8                   | 21                      | 10.2 ± 0.8                                     | 2.56 ± 0.38                                                      |
| F238K          | 9.2                   | 27                      | 2.8 ± 0.5                                      | 0.83 ± 0.11                                                      |
| R280A          | 7.1                   | 16.4                    | 16.9 ± 0.5                                     | 0.81 ± 0.09                                                      |
| R280V          | 6.1                   | 14.2                    | 15.9 ± 0.3                                     | 1.12 ± 0.06                                                      |
| TS             | 9.2                   | 21.7                    | 11.9 ± 0.9                                     | 1.00 ± 0.06                                                      |

TABLE S5

Comparison of the depolymerization performances of TS-ΔIsPET variant (this study) with improved IsPETase variants reported in previous studies. The rate of depolymerization has been calculated until the time at which the products concentration reached a plateau.

| IsPETase variant              | Substrate                                                                       | Products concentration<br>( $\mu\text{M}$ ) <sup>1</sup> | Rate of product formation<br>( $\mu\text{M}_{\text{products}}/\mu\text{g}_{\text{enzyme}}/\text{day}$ ) | Relative rate <sup>3</sup><br>(%) | Fold increase vs WT | Experimental conditions    | Enzyme amount<br>( $\mu\text{g}$ ) | Detection method | Ref |
|-------------------------------|---------------------------------------------------------------------------------|----------------------------------------------------------|---------------------------------------------------------------------------------------------------------|-----------------------------------|---------------------|----------------------------|------------------------------------|------------------|-----|
| W159H/S238F                   | PET film ( $\varnothing$ 6 mm, synthesis, 15% crystallinity)                    | 1250                                                     | 390.6                                                                                                   | 778                               | 1.03                | 4 days<br>30 °C<br>pH 7.2  | 0.8                                | HPLC             | [2] |
| S121E/D186H/R280A             | PET film ( $\varnothing$ 6 mm, UBIGEO)                                          | 108                                                      | 7.7                                                                                                     | 15                                | 5.2                 | 3 days<br>40 °C<br>pH 9.0  | 4.6                                | HPLC             | [3] |
| R280A                         | PET film ( $\varnothing$ 6 mm, UBIGEO)                                          | 31.2                                                     | 11.6                                                                                                    | 23                                | 1.2                 | 36 h<br>30 °C<br>pH 9.0    | 1.8                                | HPLC             | [4] |
| Y87A                          | PET bottle ( $\varnothing$ 6 mm)                                                | 0.053                                                    | 0.06                                                                                                    | 0.1                               | 2.9                 | 20 h<br>30 °C<br>pH 9.0    | 1.1                                | HPLC             | [5] |
| S121E/D186H/S242T/N246D       | PET film ( $\varnothing$ 6 mm, drinking bottle fabrics)                         | 800                                                      | 7.3                                                                                                     | 15                                | 3.8 <sup>2</sup>    | 24 days<br>37 °C<br>pH 9.0 | 4.6                                | HPLC             | [6] |
| I179F                         | PET film (1.5 x 1.0 cm, Goodfellow)                                             | (4.95 mg)                                                | n.d.                                                                                                    | n.d.                              | 2.7                 | 2 days<br>30 °C<br>pH 8.5  | 5                                  | Weight loss      | [7] |
| R280A/S121E/D186H/N233C/S282C | Amorphous PET film (0.64 cm <sup>2</sup> x 250 $\mu\text{m}$ thick, Goodfellow) | 4000                                                     | 55.5                                                                                                    | 111                               | 5.3                 | 6 days<br>30 °C<br>pH 9.0  | 12                                 | HPLC             | [8] |

|                                             |                                                           |          |       |      |      |                             |      |               |            |
|---------------------------------------------|-----------------------------------------------------------|----------|-------|------|------|-----------------------------|------|---------------|------------|
| <b>DuraPETase</b>                           | Semicrystalline PET film (ø 8 mm, synthesis) <sup>4</sup> | 3000     | 85.7  | 171  | 10.3 | 7 days<br>37 °C<br>pH 9.0   | 5    | HPLC          | [9]        |
|                                             | Microplastics (ø 0.1 - 1 mm, synthesis) <sup>4</sup>      | 9900     | 141.4 | 282  | 9.9  | 14 days<br>37 °C<br>pH 9.0  |      |               |            |
| <b>W159H/Y229F</b>                          | PET bottle (pre-treated)                                  | (1.8 mg) | n.d.  | n.d. | n.d. | 3 days<br>40 °C             | 1000 | Weight loss   | [10]       |
| <b>S121E/W159H/D186H /F238A (TS-ΔIsPET)</b> | Microplastics (ø 300 µm, Goodfellow)                      | 9800     | 52.3  | 100  | 4.5  | 1.25 day<br>45 °C<br>pH 8.0 | 150  | UV absorption | This study |
|                                             | PET nanoparticles (ø 80 nm, our procedure) <sup>5</sup>   | 18000    | 21400 | 100  | n.d. | 1 h<br>45 °C<br>pH 8.0      | 20   | UV absorption | This study |

<sup>1</sup> Total amount of soluble products (TPA, MHET and BHET)

<sup>2</sup> Calculated after 4 days at 25 °C, before the inactivation of the wild-type enzyme

<sup>3</sup> Relative to the rate measured for TS-ΔIsPET

<sup>4</sup> Produced starting from PET granules (Sigma-Aldrich)

<sup>5</sup> Reaction was set up in a volume of 1.0 mL by adding 0.02 mg mL<sup>-1</sup> of ΔIsPET variants to 5.2 mg mL<sup>-1</sup> of PET nanoparticles



**FIGURE S1**

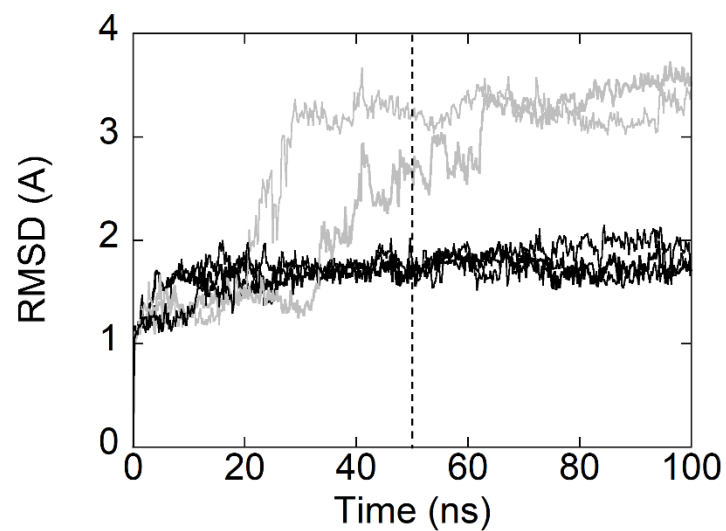

**FIGURE S1.** All-atom RMSD of the three simulations in which the substrate remained bound to the enzyme binding pocket. The frames of the last 100 ns of the simulations reached RMSD convergence at  $1.5 \pm 2$  Å and were used for subsequent analyses. The corresponding moving average is shown in red (window of 1 ns).

**FIGURE S2**

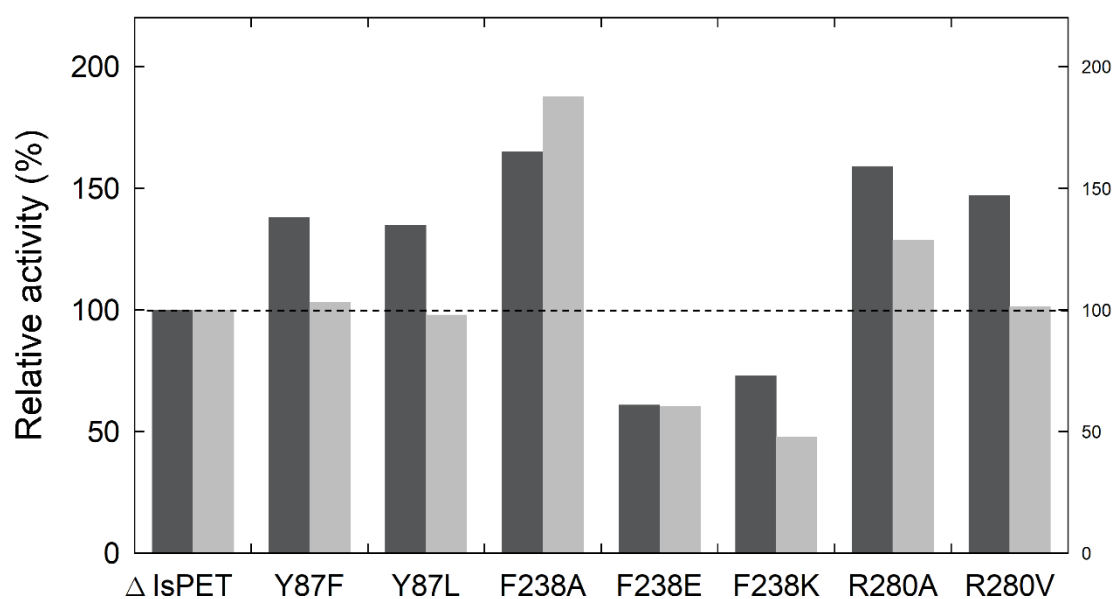

**FIGURE S2.** Comparison of the relative hydrolytic activity of  $\Delta$ IsPET variants on PET nanoparticles between the high-throughput colorimetric screening method and the turbidimetric assay. In dark gray, relative activity of cell lysate  $\Delta$ IsPET variants measured by the PSP method in 1 mM sodium phosphate buffer, 100 mM NaCl, pH 8.1 at 50 °C; in light gray, relative hydrolytic activity of 0.04 mg mL<sup>-1</sup> purified  $\Delta$ IsPET variants assayed by the turbidimetric method in 50 mM sodium phosphate buffer, 100 mM NaCl, pH 8.0 at 30 °C. The activity of the  $\Delta$ IsPET is set as 100% (dashed line).

**FIGURE S3**

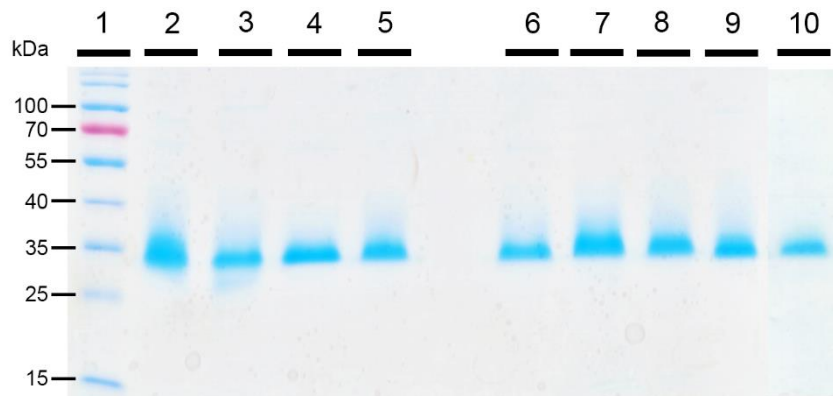

**FIGURE S3.** SDS-PAGE analysis of all the purified  $\Delta$ IsPET variants assayed in this study. Lane 1: Marker PageRuler Prestained Protein Ladder; lane 2:  $\Delta$ IsPET; lane 3: Y87F- $\Delta$ IsPET; lane 4: Y87L- $\Delta$ IsPET; lane 5: F238A- $\Delta$ IsPET; lane 6: R280A- $\Delta$ IsPET; lane 7: R280V- $\Delta$ IsPET; lane 8: TS- $\Delta$ IsPET; lane 9: F238E- $\Delta$ IsPET; lane 10: F238K- $\Delta$ IsPET (3  $\mu$ g of total proteins were loaded).

**FIGURE S4**

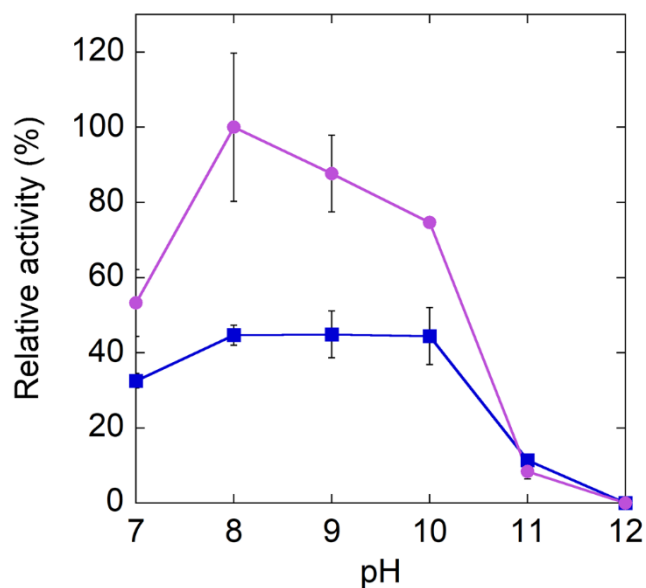

**FIGURE S4.** Relative activity of  $\Delta$ IsPET (■) and TS- $\Delta$ IsPET variant (●) on PET nanoparticles as a function of pH. The highest figure was set as 100%. Activity was reported as relative turbidity decrease/min at 30 °C with 0.094 mg mL<sup>-1</sup> of nanoparticles and 0.02 mg mL<sup>-1</sup> enzyme. Buffer: 50 mM sodium phosphate buffer and 100 mM NaCl. Bars represent mean  $\pm$  SD for three determinations.

**FIGURE S5**

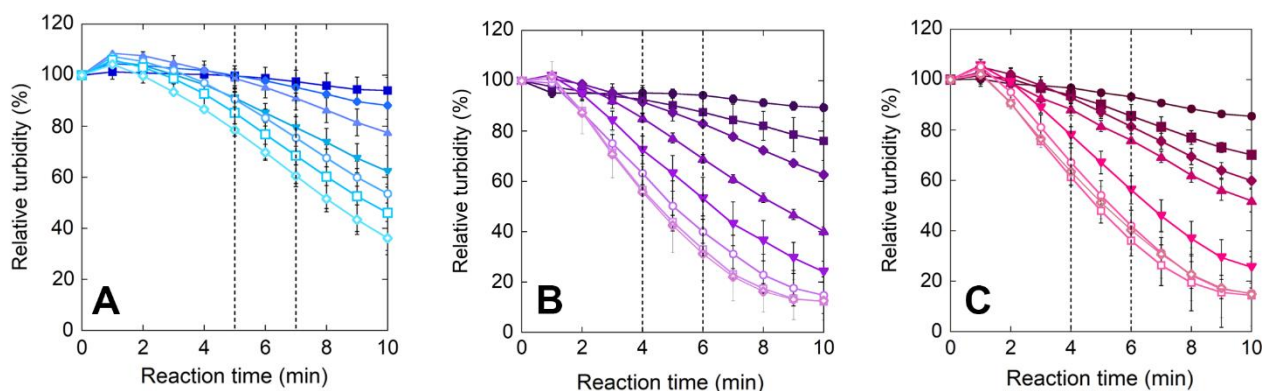

**Figure S5.** Time course of relative decrease in turbidity of PET nanoparticles solution incubated with increasing concentrations of  $\Delta$ IsPET (A), F238A- $\Delta$ IsPET (B), and TS- $\Delta$ IsPET (C). Values have been corrected for the control without the enzyme. Only the values recorded at one minute interval are reported; error bars indicate the standard deviation. The linear region used to calculate the initial reaction rates is delimited by dashed lines. Reaction conditions: 0.094 mg mL<sup>-1</sup> of nanoparticles in 50 mM sodium phosphate buffer, 100 mM NaCl, pH 8.0, at 30 °C with increasing concentrations of  $\Delta$ IsPET variants: 0.001 (●), 0.025 (■), 0.05 (◆), 0.01 (▲), 0.02 (▼), 0.04 (○), 0.06 (□), and 0.08 mg mL<sup>-1</sup> (◇).

**FIGURE S6**

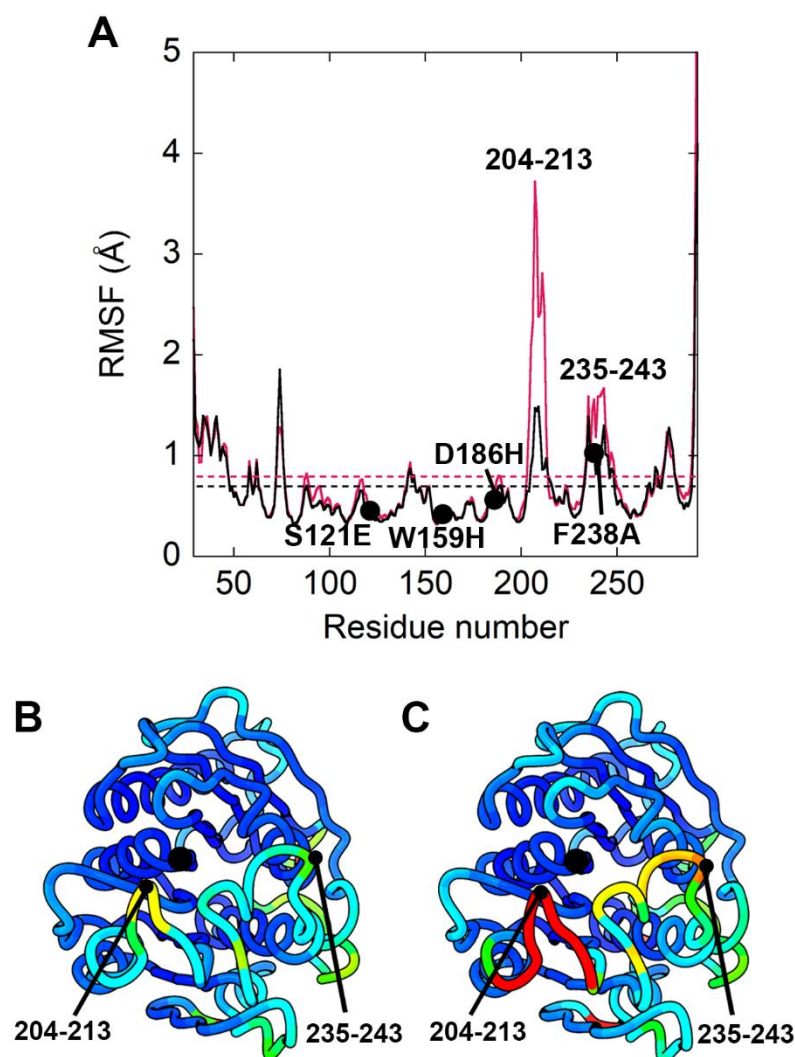

**FIGURE S6.** (A) Per-residue backbone RMSF of  $\Delta$ IsPET (black line) and F238A- $\Delta$ IsPET (red line). The average RMSF over the whole protein sequence is reported as a dashed line of the color of the corresponding variant. The positions corresponding to substitutions introduced in the TS variant are indicated by a black circle (B, C). The backbone of  $\Delta$ IsPET (B) and F238A- $\Delta$ IsPET (C) is represented as ribbon and rainbow colored according to RMSF values reported above, with increasing values going from blue to red. The black circle indicates the position of the catalytic Ser160. The images of the obtained models were generated using ChimeraX 1.1 [11].

FIGURE S7

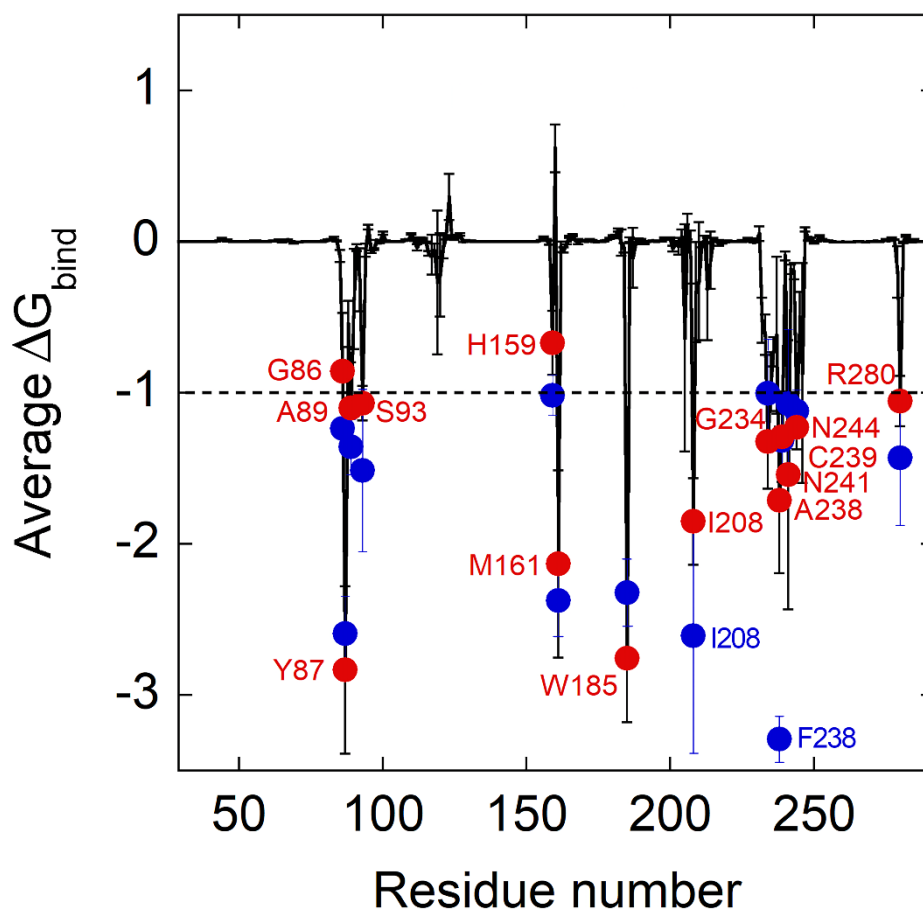

**FIGURE S7.** Plot of average and standard deviation of estimated per-residue  $\Delta G_{\text{bind}}$  for the interaction of W159H/F238A- $\Delta$ IsPET and 2-HE-(MHET)<sub>6</sub>. Residues important for the interaction with the ligand (see paragraph 2.1) are reported as red circles. The corresponding  $\Delta G_{\text{bind}}$  for the interaction between the ligand and W159H/S238F- $\Delta$ IsPET (as predicted in Fig. 2B) are shown in blue. The dashed bar represents the  $\Delta G_{\text{bind}}$  threshold of -1 kcal mol<sup>-1</sup>.

**FIGURE S8**

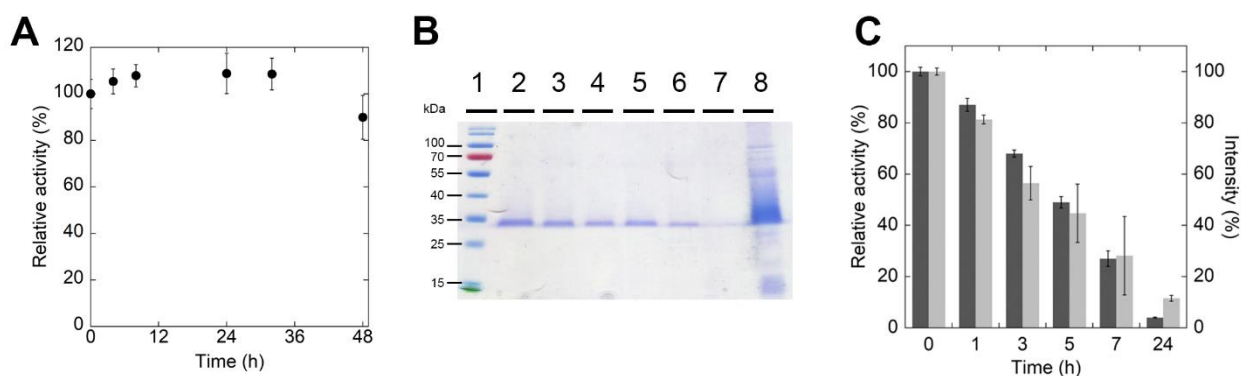

**FIGURE S8.** Determination of the adsorption of  $\Delta$ IsPET to PET microparticles. (A) Time course of thermal inactivation of TS- $\Delta$ IsPET ( $0.15 \text{ mg mL}^{-1}$ ) at  $45^\circ\text{C}$  in the absence of glycerol and PET in 50 mM sodium phosphate buffer, 100 mM NaCl, pH 8.0. Values are reported as mean  $\pm$  standard deviation for three determinations. (B) SDS-PAGE analysis of the supernatant collected at different times during incubation of  $\Delta$ IsPET with PET at  $45^\circ\text{C}$ . Lane 1: LMW markers (Prestained Protein Ladder, PageRuler<sup>TM</sup>); lanes 2-7: samples withdrawn at 0, 1, 3, 5, 7 and 24 hours; lane 8: protein removed from the microparticle surface (after denaturation in loading buffer). (C) Comparison of the activity (dark gray) and total protein (light gray, as analyzed with Image Studio) in the soluble fraction. The value determined at time zero is considered 100%. Values are the mean  $\pm$  standard deviation.



**FIGURE S9**

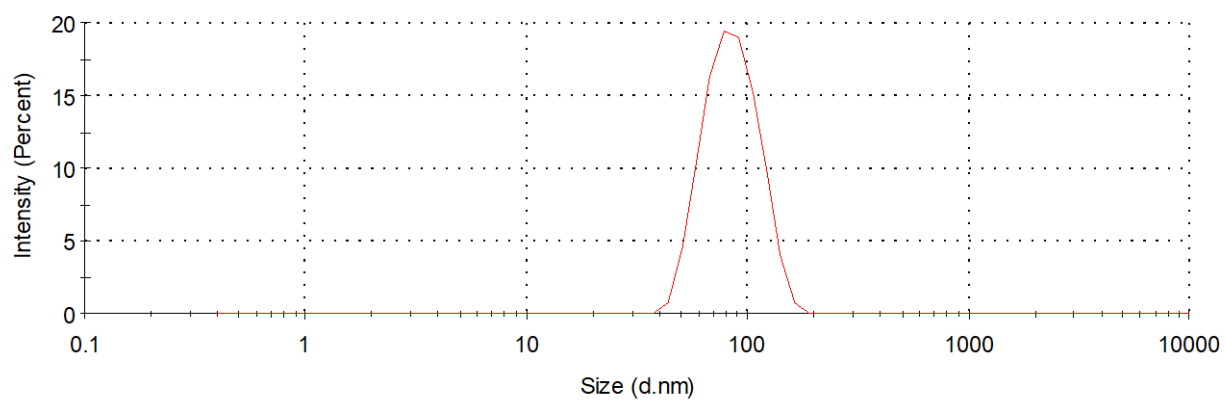

**FIGURE S9.** Analysis of the PET nanoparticles by DLS.

## FIGURE S10

ctttaagaaggagatataCATATGcagaccaatccgtatgcgcgcggccccaaccctacc  
 L - E G D I H M Q T N P Y A R G P N P T 39  
 gccgcctcgttgaagccagcgcgggaccctttaccggtcgtagctttaccgtagccgt  
 A A S L E A S A G P F T V R S F T V S R 59  
 ccgtccggatatggtgcagggaccgtctattaccaaccaatgcaggcggcaccggtggc  
 P S G Y G A G T V Y Y P T N A G G T V G 79  
 gcgattgcaatcgtccccgggtacaccgcgcgtcaaagcagcattaagtgggtgggtccg  
 A I A I V P G Y T A R Q S S I K W W G P 99  
 cgcttagctagccatggctttgtggttattaccatcgatacgaacagcacttttagaccag  
 R L A S H G F V V I T I D T N S T L D Q 119  
 cccagcagccgtagctcgcaacagatggccgcgcttcgtcaagttgcgagcttgaacggg  
 P S S R S S Q Q M A A L R Q V A S L N G 139  
 accagcagtagcccgatttacggaaaggtcgatactgccgcgatgggtgtgatgggcat  
 T S S S P I Y G K V D T A R M G V M G H 159  
 tcaatggggggcggcggttcacttattagcgccgcgaacaacccgagtttaaaagcagcg  
 S M G G G G S L I S A A N N P S L K A A 179  
 gcaccgcaggcgcctatgggactcttcaaccaacttcagcagtggtaccgtgccgacgctg  
 A P Q A P W D S S T N F S S V T V P T L 199  
 attttcgcgtgcgagaatgatagcattgcaccggtgaacagcagcgcgctgccgatttat  
 I F A C E N D S I A P V N S S A L P I Y 219  
 gatagcatgtcccgaacgcaaaacagtttctggaaattaacggcggttagccacttttgt  
 D S M S R N A K Q F L E I N G G S H F C 239  
 gccaaactctgggaacagcaaccaggcactgatcggaaaaaagggttgcattgatgaaa  
 A N S G N S N Q A L I G K K G V A W M K 259  
 cgcttcattggataatgacaccggttactcaaccttcgcctgtgagaatcccaacagcaca  
 R F M D N D T R Y S T F A C E N P N S T 279  
 cgcgtgtcggattttcgcaccgcgaactgttccCTCGAGcaccaccaccaccaccactga  
 R V S D F R T A N C S L E H H H H H H - 298  
gatccggct  
 D P A

**FIGURE S10.** Nucleotide sequence of the synthetic DNA fragment (and amino acid sequence) encoding the  $\Delta$ IsPET from *I. sakaiensis* optimized for expression in *E. coli*. Overlaps added for assembly into pET24b are underlined. The His-tag and two additional point mutations (i.e., H159 and F238) are in bold. *Nde*I and *Xho*I restriction sites are capitalized. Residues are numbered according to the native full length sequence (UniProt A0A0K8P6T7).

## REFERENCES

1. Reetz, M.T.; Kahakeaw, D.; Lohmer, R. Addressing the numbers problem in directed evolution. *ChemBioChem* **2008**, *9*, 1797–1804, doi:10.1002/cbic.200800298.
2. Austin, H.P.; Allen, M.D.; Donohoe, B.S.; Rorrer, N.A.; Kearns, F.L.; Silveira, R.L.; Pollard, B.C.; Dominick, G.; Duman, R.; El Omari, K.; et al. Characterization and engineering of a plastic-degrading aromatic polyesterase. *Proc. Natl. Acad. Sci.* **2018**, 201718804, doi:10.1073/pnas.1718804115.
3. Son, H.F.; Cho, I.J.; Joo, S.; Seo, H.; Sagong, H.Y.; Choi, S.Y.; Lee, S.Y.; Kim, K.J. Rational Protein Engineering of Thermo-Stable PETase from *Ideonella sakaiensis* for Highly Efficient PET Degradation. *ACS Catal.* **2019**, *9*, 3519–3526, doi:10.1021/acscatal.9b00568.
4. Joo, S.; Cho, I.J.; Seo, H.; Son, H.F.; Sagong, H.Y.; Shin, T.J.; Choi, S.Y.; Lee, S.Y.; Kim, K.J. Structural insight into molecular mechanism of poly(ethylene terephthalate) degradation. *Nat. Commun.* **2018**, *9*, doi:10.1038/s41467-018-02881-1.
5. Liu, B.; He, L.; Wang, L.; Li, T.; Li, C.; Liu, H.; Luo, Y.; Bao, R. Protein crystallography and site-direct mutagenesis analysis of the poly(Ethylene terephthalate) hydrolase petase from *Ideonella sakaiensis*. *ChemBioChem* **2018**, *19*, 1471–1475, doi:10.1002/cbic.201800097.
6. Son, H.F.; Joo, S.; Seo, H.; Sagong, H.Y.; Lee, S.H.; Hong, H.; Kim, K.J. Structural bioinformatics-based protein engineering of thermo-stable PETase from *Ideonella sakaiensis*. *Enzyme Microb. Technol.* **2020**, *141*, 109656, doi:10.1016/j.enzmictec.2020.109656.
7. Ma, Y.; Yao, M.; Li, B.; Ding, M.; He, B.; Chen, S.; Zhou, X.; Yuan, Y. Enhanced Poly(ethylene terephthalate) Hydrolase Activity by Protein Engineering. *Engineering* **2018**, *4*, 888–893, doi:10.1016/j.eng.2018.09.007.
8. Zhong-Johnson, E.Z.L.; Voigt, C.A.; Sinskey, A.J. An absorbance method for analysis of enzymatic degradation kinetics of poly(ethylene terephthalate) films. *Sci. Rep.* **2021**, *11*, 1–9, doi:10.1038/s41598-020-79031-5.

9. Cui, Y.; Chen, Y.; Liu, X.; Dong, S.; Tian, Y.; Qiao, Y.; Mitra, R.; Han, J.; Li, C.; Han, X.; et al. Computational Redesign of a PETase for Plastic Biodegradation under Ambient Condition by the GRAPE Strategy. *ACS Catal.* **2021**, *11*, 1340–1350, doi:10.1021/acscatal.0c05126.
10. Meng, X.; Yang, L.; Liu, H.; Li, Q.; Xu, G.; Zhang, Y.; Guan, F.; Zhang, Y.; Zhang, W.; Wu, N.; et al. Protein engineering of stable IsPETase for PET plastic degradation by Premuse. *Int. J. Biol. Macromol.* **2021**, *180*, 667–676, doi:10.1016/j.ijbiomac.2021.03.058.
11. Pettersen, E.F.; Goddard, T.D.; Huang, C.C.; Meng, E.C.; Couch, G.S.; Croll, T.I.; Morris, J.H.; Ferrin, T.E. UCSF ChimeraX: Structure visualization for researchers, educators, and developers. *Protein Sci.* **2021**, *30*, 70–82, doi:10.1002/pro.3943.
